CORRECTION

# Correction: Fluctuations, Correlations and the Estimation of Concentrations inside Cells

Emiliano Pérez Ipiña, Silvina Ponce Dawson

There is a notation error in the sixth sentence of the fourth paragraph in the Results section. The correct sentence reads as follows: We may then consider that, after a time,  $T_{obs}$ , there is only an approximation to  $p_b$  given by  $\tilde{p}_b = \bar{N}^{(f)}(T_{obs}) / (\bar{N}^{(f)}(T_{obs}) + K_D V_{obs})$  and that fluctuations in  $N^{(f)}$ , which decay with their own correlation times, impact directly on  $\text{var}(N^{(b)})$  (and on  $\text{var}(\bar{N}^{(b)})$ ).

There is an error in [S1 Text](#). Eq 13 has a notation problem. Please view the correct [S1 Text](#) below.

## Supporting information

**S1 Text. Model and calculations.** In this text we give a more detailed description of the model and of the calculations that lead to the various formulas presented in the paper. (PDF)

## Reference

1. Pérez Ipiña E, Ponce Dawson S (2016) Fluctuations, Correlations and the Estimation of Concentrations inside Cells. PLoS ONE 11(3): e0151132. <https://doi.org/10.1371/journal.pone.0151132> PMID: 26962863

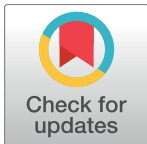

## OPEN ACCESS

**Citation:** Pérez Ipiña E, Ponce Dawson S (2018) Correction: Fluctuations, Correlations and the Estimation of Concentrations inside Cells. PLoS ONE 13(1): e0192091. <https://doi.org/10.1371/journal.pone.0192091>

**Published:** January 25, 2018

**Copyright:** © 2018 Pérez Ipiña, Ponce Dawson. This is an open access article distributed under the terms of the [Creative Commons Attribution License](#), which permits unrestricted use, distribution, and reproduction in any medium, provided the original author and source are credited.
